# Supplementary material for: Exosites in Hypervariable Loops of ADAMTS Spacer Domains control Substrate Recognition and Proteolysis
Source: PubMed Central journal article supplement (PMC6662762; doi:10.1038/s41598-019-47494-w), 2019-07-29

## SUPPORTING INFORMATION

### Exosites in Hypervariable Loops of ADAMTS Spacer Domains control Substrate Recognition and Proteolysis

Salvatore Santamaria<sup>1,\*</sup>, Kazuhiro Yamamoto<sup>2</sup>, Adrienn Teraz-Orosz<sup>1</sup>, Christopher Koch<sup>3,4</sup>, Suneel S. Apte<sup>3</sup>, Rens de Groot<sup>1</sup>, David A. Lane<sup>1</sup> and Josefin Ahnström<sup>1,\*</sup>

**Supplementary Figure 1. Full-length gels of Figure 1B and anti-versikine blots of Figure 1C and 1D. Red squares represent the part of the images showed in Figure 1.**

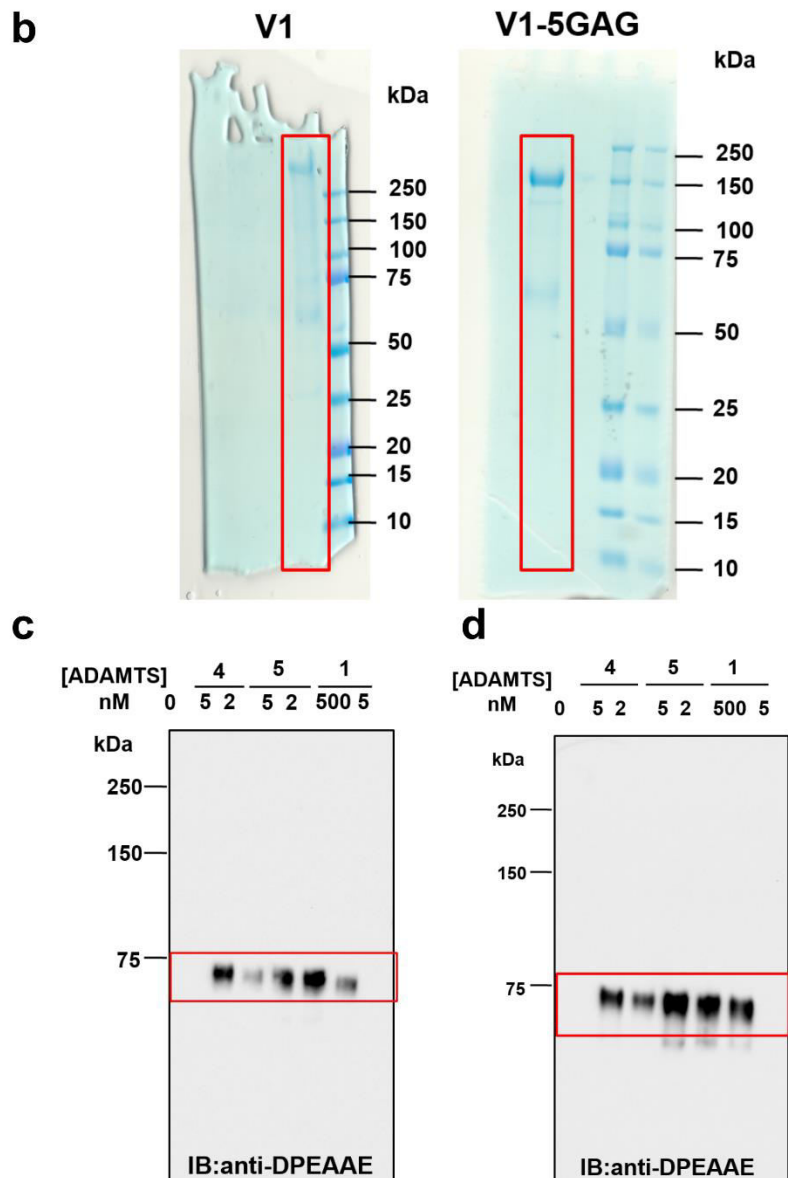

**Supplementary Figure 2. Full-length anti-DPEAAE blots of Figure 3B**

Red squares represent the part of the image showed in Figure 3B.

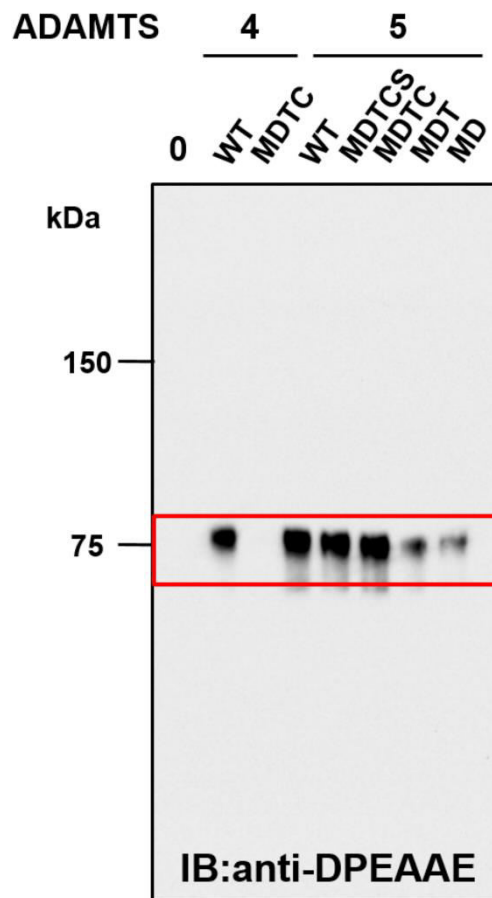

**Supplementary Figure 3. Full-length anti-DPEAAE blots of Figure 5D**

Red squares represent the part of the image showed in Figure 5D.

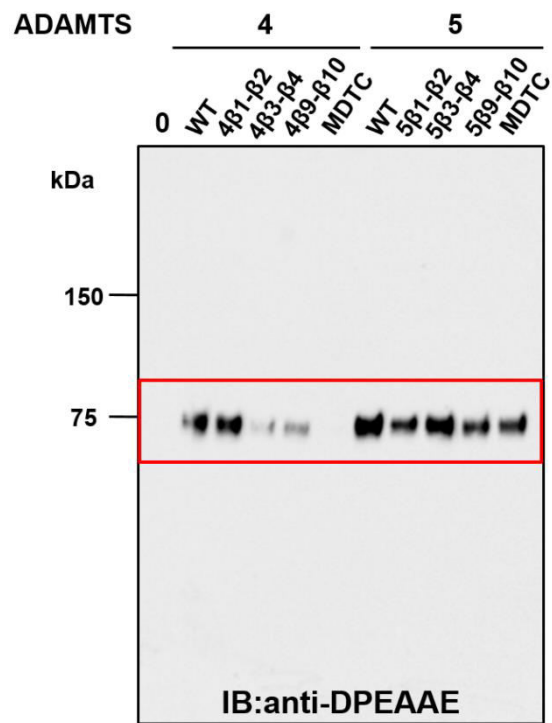

Supplement: 41598_2019_47494_MOESM1_ESM.pdf [file 41598_2019_47494_MOESM1_ESM.pdf]
